# Supplementary material for: Cr(VI) Adsorption from Aqueous Solution by UiO-66 Modified Corncob
Source: MDPI journal article supplement (doi:10.3390/su132312962), 2021-11-23
Supplement: s1 [file s1]

*Supplementary materials for*

# Cr(VI) Adsorption from aqueous solution by UiO-66 Modified Corncob

Hongzhong Xie<sup>1,4</sup>, Yanlei Wan<sup>1,2</sup>, Hao Chen<sup>1,3</sup>, Guangcheng Xiong<sup>1</sup>, Lingqing Wang<sup>5</sup>, Qi Xu<sup>1</sup>,  
Xiang Li<sup>1</sup>, Qihong Zhou<sup>1\*</sup>

1 Changjiang Institute of Survey, Planning, Design and Research Co. Ltd,  
Wuhan 430010, China; xiehongzhong@cjwsjy.com.cn(H.X.);

wanyanlei@cjwsjy.com.cn(Y.W.); chenhao@cjwsjy.com.cn(H.C.);

xiongguangcheng@cjwsjy.com.cn(G.X.); wanglq@igsrr.ac.cn(L.W.);

xuqi3@cjwsjy.com.cn(Q.X.); lixiang6@cjwsjy.com.cn(X.L.)

2 Key Laboratory of Changjiang Regulation and Protection of Ministry of Water  
Resources, Wuhan 430010, China

3 Hubei Key Laboratory of Basin Water Security, Wuhan 430010, China

4 Hubei Provincial Engineering Research Center for Comprehensive Water  
Environment Treatment in the Yangtze River Basin, Wuhan 430010, China

<sup>5</sup> Key Laboratory of Land Surface Pattern and Simulation, Institute of  
Geographical Sciences and Natural Resources Research, Chinese Academy of  
Sciences, Beijing 100101, China

Correspondence: zhouqihong@cjwsjy.com.cn(Q.Z.)

Table S1 Percentage of elements from EDS in the samples

| Elements | Corn  | Corn+ | Corn- | UiO-66@Corn+ | UiO-66@Corn- | UiO-66 |
|----------|-------|-------|-------|--------------|--------------|--------|
| C(%)     | 50.02 | 47.14 | 46.08 | 53.23        | 59.24        | 56.88  |
| O(%)     | 39.78 | 40.17 | 45.24 | 33.13        | 30.45        | 29.13  |
| N(%)     | 10.2  | 12.69 | 8.68  | 10.7         | 8.78         | 0.12   |
| Zr(%)    | /     | /     | /     | 2.95         | 1.53         | 13.87  |
